# Supplementary material
Source: Royal Society of Chemistry journal article supplement (doi:10.1039/d6ay00371k)
Supplement: d6ay00371k1.xlsx [file d6ay00371k1.xlsx]

## Sheet: Figure 2
CEV	B 11 CPS mean	SD(n=3)	B 10 CPS mean	SD(n=3)	IR mean	SD(n=3)	RSD mean	SD(n=3)
1	269991	10635.8	66989.9	2627.13	4.03033	0.0330053	0.723333	0.210079
0	391448	851.447	91680.6	99.9431	4.2697	0.00617897	0.26	0.1253
-1	424651	915.644	99981.5	241.48	4.2473	0.00242211	0.166667	0.0305505
-2	448076	2692.05	104298	691.813	4.29613	0.00285729	0.23	0.0964365
-3	444397	2146.11	101404	548.082	4.38242	0.00224858	0.193333	0.070946
-4	436694	3565.97	108950	891.41	4.00821	0.00161646	0.173333	0.0960902
-5	472248	1089.79	110285	232.854	4.28205	0.00302108	0.206667	0.0305505
-6	457361	771.189	106847	34.0369	4.28053	0.00539644	0.0966667	0.0550757
-7	448506	3275.89	107695	872.296	4.1646	0.00296181	0.12	0.0608276
-8	459571	20879.1	103102	4643.89	4.45742	0.00195608	0.19	0.113578
-9	512046	2294.56	107121	407.872	4.78008	0.00478853	0.126667	0.0763763
-10	471893	2352.22	101661	571.289	4.64183	0.00515582	0.203333	0.0757188
-11	426308	2393.54	104363	549.505	4.08486	0.00693894	0.156667	0.0321455
-12	432587	3424.15	117252	1042.85	3.68938	0.00327311	0.24	0.02
-13	476393	1002.19	124584	264.195	3.82388	0.00372996	0.166667	0.0152753
-14	525140	1118.56	122134	170.117	4.29971	0.0032016	0.143333	0.0665833
-15	530318	1488.95	112633	182.41	4.70836	0.00482352	0.116667	0.0208167
-16	511247	7164.83	103289	1320.03	4.94967	0.00555043	0.223333	0.0251661
-17	477735	632.778	95076.4	274.259	5.02475	0.00955432	0.196667	0.0665833
-18	435614	564.472	87556.7	91.2529	4.97522	0.00257018	0.143333	0.0602771
-19	384724	7583.81	79964	1631.82	4.81122	0.00448565	0.136667	0.0750555
-20	351126	4050.03	75722.1	1068.82	4.63703	0.0131658	0.14	0.02
CEV	Sr 88 CPS mean	SD(n=3)	Sr 86 CPS mean	SD(n=3)	IR mean	SD(n=3)	RSD mean	SD(n=3)
1	561093	29782.2	65270.2	3439.63	8.59582	0.0112731	0.123333	0.0503322
0	629133	2787.17	73554.5	274.119	8.55327	0.00861975	0.16	0.0519615
-1	669209	5621.94	78683.9	709.088	8.50507	0.00750313	0.103333	0.0950438
-2	703397	2219.65	83029.6	193.785	8.47168	0.0083301	0.12	0.06
-3	772244	3243.5	91295.7	396.625	8.45868	0.00540008	0.133333	0.0757188
-4	856808	4505.99	101067	552.717	8.47765	0.00667506	0.0833333	0.0251661
-5	976260	13103.1	117995	1526.32	8.2737	0.00405691	0.13	0.1
-6	1.05596e+06	6873.72	127515	833.001	8.28109	0.00811884	0.183333	0.046188
-7	1.17745e+06	8349.18	138207	944.031	8.5195	0.00223724	0.0966667	0.0723418
-8	1.0243e+06	1455.11	122973	194.89	8.32951	0.0014609	0.22	0.0519615
-9	946852	4767.92	115317	609.542	8.21089	0.0105138	0.156667	0.0737111
-10	954339	3783.65	116471	498.885	8.19381	0.00708086	0.163333	0.109697
-11	956660	3965.81	113987	449.05	8.39267	0.0018903	0.13	0.0360555
-12	892519	26819.4	106310	3413.42	8.39577	0.0172024	0.16	0.0264575
-13	884446	998.416	108958	144.747	8.11732	0.00529053	0.1	0.07
-14	898444	10215.8	111782	1294.32	8.03747	0.00455255	0.103333	0.080829
-15	912559	2249.86	112935	254.152	8.08044	0.0017403	0.123333	0.0404145
-16	926312	2615.62	113017	404.996	8.19626	0.0111851	0.183333	0.0472582
-17	889833	2709.11	105736	315.198	8.41562	0.00284662	0.11	0.0655744
-18	804603	3843.08	93560.4	511.165	8.5999	0.00781723	0.223333	0.061101
-19	700255	1763.61	82848.7	257.153	8.45224	0.00611904	0.153333	0.0873689
-20	648650	1811.03	80744.8	238.992	8.03335	0.00210239	0.166667	0.120554
CEV	Pb 208 CPS mean	SD(n=3)	Pb 206 CPS mean	SD(n=3)	IR mean	SD(n=3)	RSD mean	SD(n=3)
1	488226	10423.3	224696	4679.59	2.17283	0.00118682	0.123333	0.0550757
0	540524	8951.89	249461	4043.42	2.1667	0.00156387	0.186667	0.046188
-1	562946	5569.72	259606	2745.11	2.1685	0.00328553	0.176667	0.0907377
-2	574426	3086.26	265655	1726.85	2.16232	0.00268411	0.07	0.0458258
-3	591869	5712.85	272072	2763.22	2.17543	0.00137488	0.106667	0.0251661
-4	581811	4878	269442	2228.94	2.15932	0.000371663	0.0766667	0.023094
-5	567626	15081.8	260992	6660.63	2.17484	0.00246433	0.0666667	0.064291
-6	591403	670.261	271529	486.327	2.17805	0.00156017	0.0833333	0.0321455
-7	573608	1030.97	264824	479.227	2.166	0.00133118	0.166667	0.0378594
-8	573068	6578.65	263412	3120.07	2.17556	0.00110585	0.0766667	0.0550757
-9	525357	4956.74	240410	2073.65	2.18527	0.00349623	0.166667	0.0929157
-10	506338	1844.19	235323	981.816	2.15166	0.00171832	0.0766667	0.0832666
-11	526222	6833.34	242243	3188.13	2.17229	0.000817394	0.0766667	0.0378594
-12	483654	6626.8	218013	2845	2.21846	0.00155936	0.126667	0.0208167
-13	430667	3221.27	195440	1333.82	2.20357	0.00203118	0.106667	0.011547
-14	402928	7879.13	188037	3513.67	2.14277	0.00216583	0.103333	0.0602771
-15	410384	1432.86	187422	136.454	2.18961	0.0062601	0.106667	0.0208167
-16	368216	12997.4	163990	5833.7	2.24529	0.00051643	0.113333	0.0305505

## Sheet: Figure 3
CRO	B 11 CPS mean	SD(n=3)	B 10 CPS mean	SD(n=3)	IR mean	SD(n=3)	RSD mean	SD(n=3)
1	285784	1107.42	71438.9	231.259	4.00039	0.00826521	0.213333	0.080829
0	349775	1025.69	84793.9	290.311	4.125	0.00897715	0.193333	0.0251661
-1	368215	1254.34	89280.9	472.048	4.12423	0.00673481	0.243333	0.119304
-2	354143	2681.2	86289.3	623.582	4.10413	0.00580147	0.156667	0.0950438
-3	374368	1368.67	91356.1	384.404	4.0979	0.00746072	0.143333	0.0665833
-4	379656	875.291	91700.3	142.803	4.14018	0.00376644	0.136667	0.0208167
-5	365820	1488.57	88063.7	391.948	4.15403	0.00420058	0.213333	0.0723418
-6	389180	3314.41	96661.5	810.487	4.02621	0.00259423	0.133333	0.104083
-7	376034	1785.87	93384.4	532.904	4.02674	0.0038932	0.193333	0.125033
-8	418237	1604.22	102141	408.184	4.09471	0.00137249	0.1	0.0458258
-9	413297	1525.39	101562	503.956	4.06941	0.00579808	0.103333	0.0493288
-10	311519	2627.19	74143	848.151	4.2016	0.0112411	0.27	0.0818535
-11	249315	1079.26	60099.3	229.254	4.14839	0.00205796	0.226667	0.145029
-12	359880	2016.36	88288.4	363.201	4.07618	0.00523819	0.18	0.03
-13	420859	1304.35	106145	334.906	3.96492	0.00434887	0.14	0.0866025
-14	348888	856.545	92282.7	242.678	3.78065	0.00245001	0.123333	0.0305505
-15	255728	2859.14	67373.8	741.962	3.79566	0.000757386	0.23	0.0608276
-16	248977	926.806	64741.1	299.714	3.84573	0.00379503	0.143333	0.0208167
CRO	Sr 88 CPS mean	SD(n=3)	Sr 86 CPS mean	SD(n=3)	IR mean	SD(n=3)	RSD mean	SD(n=3)
1	1.1559e+06	12301.3	138238	1541.51	8.36169	0.00828122	0.13	0.0655744
0	1.2009e+06	3936.3	143816	499.612	8.35027	0.00209061	0.0933333	0.092376
-1	1.21502e+06	1598.73	143915	285.908	8.44264	0.00767874	0.0633333	0.051316
-2	1293873	1529.41	153551	116.274	8.42638	0.00474174	0.106667	0.0416333
-3	1.05619e+06	69542.8	128459	8519.78	8.22187	0.0119189	0.21	0.03
-4	1.34783e+06	5865.3	158795	832.148	8.48785	0.00845023	0.0666667	0.0057735
-5	1.14232e+06	9295.08	137250	1299.61	8.32299	0.0163151	0.18	0.087178
-6	1.28291e+06	2191.23	152984	262.414	8.38596	0.00285795	0.103333	0.0665833
-7	1.48594e+06	9104.42	177358	1017.7	8.37825	0.00812309	0.216667	0.111505
-8	999790	2830.76	121184	355.737	8.25019	0.00313128	0.156667	0.0737111
-9	883557	6958.61	105696	793.078	8.35942	0.00448632	0.103333	0.0057735
-10	1.11183e+06	4593.41	131529	618.559	8.45316	0.00508465	0.1	0.087178
-11	1.44545e+06	19432.7	170749	2342.63	8.46539	0.0023514	0.173333	0.0057735
-12	945023	5275.32	114496	625.807	8.25376	0.00946968	0.216667	0.051316
-13	886781	3364.75	105372	502.232	8.41577	0.0143645	0.0866667	0.0305505
-14	968752	6585.34	114816	785.074	8.43742	0.00377135	0.0466667	0.0288675
-15	835382	15594.8	101927	1936.57	8.19599	0.0028628	0.143333	0.0832666
-16	587812	2244.75	71024.5	281.606	8.27617	0.00194826	0.0966667	0.0776745
CRO	Pb 208 CPS mean	SD(n=3)	Pb 206 CPS mean	SD(n=3)	IR mean	SD(n=3)	RSD mean	SD(n=3)
1	402265	6893.46	184065	3048.47	2.18541	0.00218111	0.18	0.0793725
0	400626	1316.57	182321	721.689	2.19738	0.00154733	0.186667	0.0750555
-1	440280	1260.27	199930	741.167	2.20217	0.00418116	0.133333	0.111505
-2	329063	1665.41	149849	730.694	2.19595	0.000635164	0.153333	0.0568624
-3	430080	2288.59	194138	1068.73	2.21534	0.00127884	0.126667	0.0208167
-4	356651	5393.48	164703	2601.71	2.16543	0.00148607	0.116667	0.0404145
-5	330103	5954.82	147816	2723.68	2.2332	0.000959653	0.126667	0.0288675
-6	530308	2817.56	244190	997.725	2.1717	0.00320585	0.1	0.04
-7	345683	11982	155774	5319.12	2.21908	0.001275	0.133333	0.111505
-8	267886	1365.75	122590	607.739	2.18523	0.00179767	0.286667	0.0321455
-9	260697	580.422	118848	294.616	2.19356	0.000515073	0.196667	0.117189
-10	419266	1068.55	190569	773.363	2.20009	0.0033277	0.103333	0.0404145
-11	502360	2326.14	231479	1229.95	2.17022	0.0017003	0.123333	0.0208167
-12	342735	3534.65	155766	1286.46	2.20029	0.0045835	0.08	0.02
-13	256328	2523.08	116247	1033.58	2.20505	0.00220998	0.143333	0.0723418

## Sheet: Figure 4
QRO	B 11 CPS mean	SD(n=3)	B 10 CPS mean	SD(n=3)	IR mean	SD(n=3)	RSD mean	SD(n=3)
2	324195	9642.03	77427.5	2301.3	4.18707	0.0113617	0.286667	0.0802081
1	366150	5570.01	87423.7	1393.39	4.18823	0.00569885	0.246667	0.080829
0	391777	10255.9	93372	2546.68	4.19587	0.00550286	0.353333	0.100167
-1	424590	45297.4	101945	10955.4	4.16488	0.00930285	0.263333	0.023094
-2	458045	605.445	111635	43.6643	4.10306	0.00339238	0.2	0.121655
-3	457222	3569.98	112040	1043.78	4.08087	0.00559041	0.12	0.0173205
-4	450555	927.689	111704	284.633	4.03348	0.00400871	0.156667	0.0814453
-5	447303	1087.91	111833	232.596	3.99974	0.00938367	0.176667	0.0321455
-6	445556	1325.87	111509	436.355	3.99571	0.00334884	0.103333	0.0378594
-7	436851	1805.14	110499	631.07	3.95343	0.00540079	0.263333	0.023094
-8	423800	2280.24	108133	555.346	3.91925	0.000932756	0.196667	0.0723418
-9	414522	2430.38	106274	665.125	3.9005	0.00264704	0.216667	0.011547
-10	405900	907.263	104321	307.644	3.89088	0.00368114	0.1	0.112694
-11	403380	5266.13	103695	1601.7	3.89007	0.00805922	0.17	0.108167
-12	398303	13225.6	102539	3549.49	3.8844	0.00493263	0.16	0.07
QRO	Sr 88 CPS mean	SD(n=3)	Sr 86 CPS mean	SD(n=3)	IR mean	SD(n=3)	RSD mean	SD(n=3)
2	716298	19365.3	85967.9	2291.28	8.33234	0.00765031	0.2	0.0754983
1	798053	14429.8	96076.8	1746.39	8.30641	0.00553124	0.0833333	0.061101
0	909375	8763	109370	1064.5	8.31464	0.00442009	0.173333	0.0568624
-1	986143	20200.7	118507	2422.98	8.32142	0.00181023	0.21	0.034641
-2	1.04087e+06	45123.7	124979	5337.43	8.32787	0.00708336	0.0866667	0.057735
-3	1.09614e+06	8631.34	131001	908.795	8.36739	0.00793607	0.11	0.072111
-4	1.10242e+06	7321.59	130964	939.109	8.41783	0.0063668	0.19	0.0458258
-5	1.09149e+06	1027.13	129647	46.8455	8.41895	0.00906821	0.113333	0.0873689
-6	1.09383e+06	4458.07	129489	386.106	8.44726	0.0108283	0.186667	0.0802081
-7	1.08988e+06	4510.13	128001	523.481	8.51468	0.0081192	0.18	0.0264575
-8	1.05107e+06	8921.02	123894	1173.14	8.48367	0.00910593	0.153333	0.046188
-9	1.0166e+06	8259.13	119890	1101.92	8.47949	0.0102599	0.0733333	0.0251661
QRO	Pb 208 CPS mean	SD(n=3)	Pb 206 CPS mean	SD(n=3)	IR mean	SD(n=3)	RSD mean	SD(n=3)
2	553152	46512.1	258471	21758.1	2.14007	0.00174034	0.0766667	0.0665833
1	618014	4172.07	289000	1727.62	2.13847	0.00165802	0.16	0.043589
0	641209	12245.6	296589	5792.83	2.16197	0.00170007	0.223333	0.070946
-1	665669	2239.26	307735	784.453	2.16317	0.0020353	0.17	0.0264575
-2	669755	19831.7	311401	9398.1	2.15081	0.00168951	0.123333	0.0404145
-3	698391	5292.13	321448	2336.06	2.17266	0.00183919	0.0733333	0.0305505
-4	684078	6817.25	316583	2808.53	2.16079	0.00245702	0.0533333	0.0665833
-5	698096	6571.16	320251	2932.88	2.17985	0.00121541	0.123333	0.064291
-6	687994	4248.22	316335	2136.48	2.17491	0.001475	0.0866667	0.0568624
-7	677828	22367	308314	9839.84	2.19853	0.00229698	0.103333	0.0378594
-8	711976	1444.15	325794	656.855	2.18536	0.000871091	0.123333	0.011547
-9	705841	928.805	320486	404.11	2.20241	0.000594334	0.09	0.052915
-10	703243	1690.98	318964	505.637	2.20477	0.00226954	0.0933333	0.0472582
-11	693255	10509.3	313504	4713.71	2.21131	0.00185109	0.05	0.034641
-12	678855	1435.5	313632	589.003	2.16449	0.00226542	0.0733333	0.0416333

## Sheet: Figure 5
	11B/10B		88Sr/86Sr		208Pb/206Pb
Scans	RSD mean	SD(n=3)	RSD mean	SD(n=3)	RSD mean	SD(n=3)
100	0.71667	0.17214	0.26667	0.12662	0.25667	0.17898
300	0.32333	0.04933	0.16667	0.05033	0.12	0.05196
600	0.28	0.07	0.08667	0.01155	0.06667	0.04933
1000	0.19	0.06245	0.10667	0.05132	0.07667	0.05033
	11B/10B		88Sr/86Sr		208Pb/206Pb
Dwell time	RSD mean	SD(n=3)	RSD mean	SD(n=3)	RSD mean	SD(n=3)
1	0.28333	0.02887	0.34333	0.15567	0.17	0.13
2	0.29667	0.13013	0.17333	0.08386	0.1	0.01732
5	0.12333	0.03786	0.08	0.06928	0.06	0.01732
10	0.35667	0.1106	0.09	0.02646	0.07333	0.05508
20	0.23	0.11533	0.08	0.04583	0.06	0.01
50	0.31667	0.15275	0.09333	0.04933	0.04667	0.02887
	11B/10B		88Sr/86Sr		208Pb/206Pb
Readings	RSD mean	SD(n=3)	RSD mean	SD(n=3)	RSD mean	SD(n=3)
1	0.43333	0.24007	0.15	0.02646	0.09667	0.00577
2	0.20667	0.12662	0.10333	0.07506	0.11	0.05568
3	0.12333	0.09018	0.09333	0.02517	0.08333	0.02082
5	0.18667	0.05686	0.11333	0.05508	0.11	0.05292
10	0.13333	0.08505	0.05	0.02646	0.06	0.04
	11B/10B		88Sr/86Sr		208Pb/206Pb
Replicates	RSD mean	SD(n=3)	RSD mean	SD(n=3)	RSD mean	SD(n=3)
3	0.14	0.06	0.08	0.02	0.09667	0.00577
5	0.25333	0.06807	0.13667	0.02309	0.14667	0.04726
10	0.26333	0.05859	0.16	0.03	0.1	0.01732

## Sheet: Table 2-4
		δ11 B (mean±2SD, n=3)
Sample	Type	This study	Reported values Ref.	Method
AGV-2	Andesite	-4.45±0.42	-4.5±1.10 18	MC-ICP-MS
			-4.18±0.31 19	MC-ICP-MS
			-4.5±0.39 20	MC-ICP-MS
			-4.1±0.5 (2SE) 21	MC-ICP-MS
			-3±0.4 22	MC-ICP-MS
			-4.78±0.8 23	MC-ICP-MS
BCR-2	Basalt	-5.86±0.32	-5.93±1.06 18	MC-ICP-MS
			-4.43±0.54 (2SE) 21	MC-ICP-MS
			-5.9±0.2 22	MC-ICP-MS
			-5.7±0.70 32	MC-ICP-MS
BHVO-2	Basalt	-2.71±1.20	-1.61±1.24 18	MC-ICP-MS
			-0.53±0.5 (2SE) 21	MC-ICP-MS
			-0.7±0.1 22	MC-ICP-MS
			-2.38±0.94 32	MC-ICP-MS
		δ88/86 Sr (mean±2SD, n=3)
Sample	Type	This study	Reported values Ref.	Method
AGV-2	Andesite	0.29±0.32	0.253±0.019 33	TIMS
			0.27±0.038 24	MC-ICP-MS
BCR-2	Basalt	0.26±0.34	0.28±0.10 36	TIMS
			0.284±0.075 24	MC-ICP-MS
			0.24±0.09 34	MC-ICP-MS
			0.22±0.07 35	MC-ICP-MS
BHVO-2	Basalt	0.27±0.16	0.306±0.026 41	TIMS
			0.248±0.014 24	MC-ICP-MS
			0.24±0.24 34	MC-ICP-MS
		208Pb/206Pb (mean±2SD, n=3)
Sample	Type	This study	Reported values Ref.	Method
AGV-2	Andesite	2.04640±0.00212	2.0417±0.0004 26	MC-ICP-MS
			2.043±0.0009 29	MC-ICP-MS
			2.04349±0.00074 30	MC-ICP-MS
			2.0433±0.00108 31	MC-ICP-MS
			2.049±0.00410 (2SE) 25	LA-ICP-MS
			2.0417±0.0038 27	ICP-MS
			2.0415±0.0026 28	ICP-MS
BCR-2	Basalt	2.06609±0.00132	2.0646±0.0008 26	MC-ICP-MS
			2.06528±0.0001 29	MC-ICP-MS
			2.06516±0.0009 30	MC-ICP-MS
			2.0653±0.00118 31	MC-ICP-MS
			2.06385±0.00004 38	MC-ICP-MS
			2.064±0.00165 (2SE) 25	LA-ICP-MS
			2.0647±0.002 27	ICP-MS
			2.0635±0.0032 28	ICP-MS
			2.067±0.004 37	ICP-MS
			2.066±0.008 (2SE) 39	ICP-MS
			2.0658±0.0065 40	ICP-MS
BHVO-2	Basalt	2.04952±0.00308	2.0492±0.001 26	MC-ICP-MS
			2.04949±0.00033 29	MC-ICP-MS
			2.04921±0.00007 38	MC-ICP-MS
			2.0516±0.0038 42	MC-ICP-MS
			2.051±0.00410 (2SE) 25	LA-ICP-MS
			2.0507±0.0032 27	ICP-MS
GBW07109 (GSR-7)	Syenite	2.17211±0.00240	2.17237±0.00004 43	MC-ICP-MS
GBW07364 (GSD-21)	Sediment	2.09333±0.00186	2.09358±0.00158 44	MC-ICP-MS
GBW07366 (GSD-23)	Sediment	2.10290±0.00224	2.10262±0.00157 44	MC-ICP-MS
GBW07428 (GSS-14)	Soil	2.10776±0.00128	2.10713±0.00003 44	MC-ICP-MS
